# Supplementary material for: A polyomavirus peptide binds to the capsid VP1 pore and has potent antiviral activity against BK and JC polyomaviruses
Source: eLife. 2020 Jan 21;9:e50722. doi: 10.7554/eLife.50722 (PMC6974358; doi:10.7554/eLife.50722)
Supplement: Supplementary file 1. [file elife-50722-supp1.xls]

## Sheet: Supplemental Table S1 
Supplemental Table S1. JCV VP1 peptide binding data (mean±SD, n=2)
Peptide Name	Sequence	AlphaScreen JCV VP1 IC50 (nM)	SPR JCV VP1 KD (nM)
BKV D122	APGGANQRTAPQWMLPLLLGLY	90±19	13
JCV D122	APGGANQRSAPQWMLPLLLGLY	44±6.4	8.4
