# Supplementary material for: A polyomavirus peptide binds to the capsid VP1 pore and has potent antiviral activity against BK and JC polyomaviruses
Source: eLife. 2020 Jan 21;9:e50722. doi: 10.7554/eLife.50722 (PMC6974358; doi:10.7554/eLife.50722)
Supplement: Supplementary file 3. [file elife-50722-supp3.xls]

## Sheet: Supplemental Table S3
Data collection and refinement statistics (molecular replacement)
	BKV VP1 pentamer-D1min
Data collection
Space group	P 21 21 21
Cell dimensions
a, b, c (Å)	89.47, 124.27, 127.83
α, β, γ (°)	90.00, 90.00, 90.00
Resolution (Å)	89.10 – 2.36
Rsym or Rmerge	0.09(0.705)
CC1/2	0.972(0.30)
I / σI	14.9(4.5)
Completeness (%)	99.9 (99.7)
Redundancy	22.0(14.7)
Refinement
Resolution (Å)	44.70-2.36
No. reflections	16198
Rwork / Rfree	0.199/0.257
No. atoms
Protein	3106
Ligand/ion	2
Water	195
B-factors
Protein	58.63
Ligand/ion	34.1
Water	50.32
R.m.s. deviations
Bond lengths (Å)	0.01
Bond angles (°)	1.13
