# Supplementary material for: A polyomavirus peptide binds to the capsid VP1 pore and has potent antiviral activity against BK and JC polyomaviruses
Source: eLife. 2020 Jan 21;9:e50722. doi: 10.7554/eLife.50722 (PMC6974358; doi:10.7554/eLife.50722)
Supplement: Supplementary file 4. [file elife-50722-supp4.xls]

## Sheet: Supplemental Table S4
Supplemental Table S4. Control inhibitor half-maximal effective concentrations (EC50) and half-maximal cytotoxic concentrations (CC50).
Inhibitor	Type	EC50 (nM)	CC50 (µM)
TAT-D1min	peptide	100	9.6
D1min-TAT	peptide	79	7.5
P8D11	monoclonal antibody	0.35 (50 ng/mL)	Not observed
